# Supplementary material
Source: PubMed Central journal article supplement (PMC8442175)
Supplement: Murata_T_PARCS_study_Supplementary_File_rev2.pdf [file Murata_T_PARCS_study_Supplementary_File_rev2.pdf]

## **Materials and Methods**

### **CSII-QOL**

The CSII-QOL is a recently developed QOL scale specific to CSII, and is a validated and reliable instrument<sup>14</sup>. The 25-item questionnaire has a three-domain structure ("convenience", "social restriction", and "psychological problems"), high internal consistency (Cronbach's alpha = 0.870), and substantial test-retest reliability (intraclass correlation coefficient = 0.65).

Table S1. The 20 items of PAID at baseline

| Variables | Total     | Adherent  | Non-adherent | <i>P</i> -value |
|-----------|-----------|-----------|--------------|-----------------|
| 1         | 1.2 (1.1) | 1.3 (1.3) | 0.9 (0.8)    | 0.248           |
| 2         | 1.5 (1.2) | 1.5 (1.3) | 1.4 (1.2)    | 0.959           |
| 3         | 2.1 (1.3) | 2.1 (1.4) | 1.9 (1.1)    | 0.518           |
| 4         | 1.0 (1.1) | 1.1 (1.0) | 0.8 (1.1)    | 0.256           |
| 5         | 1.1 (1.0) | 1.3 (1.1) | 0.9 (0.8)    | 0.222           |
| 6         | 1.9 (1.3) | 2.2 (1.3) | 1.6 (1.2)    | 0.089           |
| 7         | 1.6 (1.1) | 1.9 (1.1) | 1.1 (0.9)    | 0.019*          |
| 8         | 1.3 (1.1) | 1.4 (1.2) | 1.1 (1.0)    | 0.423           |
| 9         | 2.3 (1.2) | 2.5 (1.2) | 1.9 (1.2)    | 0.103           |
| 10        | 1.3 (1.1) | 1.5 (1.2) | 1.0 (1.1)    | 0.184           |
| 11        | 1.5 (1.2) | 1.9 (1.2) | 0.9 (0.9)    | 0.004*          |
| 12        | 2.9 (0.8) | 2.9 (0.8) | 2.8 (0.6)    | 0.674           |
| 13        | 1.9 (1.1) | 2.3 (1.1) | 1.3 (0.8)    | 0.001*          |
| 14        | 0.7 (0.9) | 0.9 (1.1) | 0.6 (0.7)    | 0.396           |
| 15        | 0.3 (0.6) | 0.2 (0.4) | 0.5 (0.7)    | 0.134           |
| 16        | 1.5 (1.2) | 1.7 (1.1) | 1.3 (1.2)    | 0.253           |
| 17        | 0.6 (0.9) | 0.6 (0.8) | 0.7 (1.0)    | 0.668           |
| 18        | 0.7 (0.8) | 0.9 (0.8) | 0.5 (0.8)    | 0.159           |
| 19        | 1.4 (1.3) | 1.8 (1.3) | 0.9 (1.0)    | 0.034*          |
| 20        | 1.0 (1.0) | 1.3 (1.0) | 0.6 (0.9)    | 0.018*          |

Data are presented as the mean (SD) or number.

\**P* < 0.05

Table S2. Responses of severe distress to the 20 items

| Query number | Total<br>(n=46) | Adherent<br>(n=28) | Non-adherent<br>(n=18) | <i>P</i> -value |
|--------------|-----------------|--------------------|------------------------|-----------------|
| 1            | 13.0            | 21.4               | 0.0                    | 0.035           |
| 2            | 26.1            | 25.0               | 28.0                   | 0.834           |
| 3            | 47.8            | 50.0               | 44.0                   | 0.713           |
| 4            | 13.0            | 14.3               | 11.0                   | 0.755           |
| 5            | 8.7             | 14.3               | 0.0                    | 0.093           |
| 6            | 41.3            | 46.4               | 33.0                   | 0.379           |
| 7            | 19.6            | 32.1               | 0.0                    | 0.007*          |
| 8            | 13.0            | 17.9               | 6.0                    | 0.277           |
| 9            | 45.7            | 50.0               | 39.0                   | 0.460           |
| 10           | 13.0            | 14.3               | 11.0                   | 0.755           |
| 11           | 23.9            | 35.7               | 6.0                    | 0.019           |
| 12           | 76.1            | 71.4               | 83.0                   | 0.356           |
| 13           | 30.4            | 50.0               | 0.0                    | <0.001*         |
| 14           | 4.3             | 7.1                | 0.0                    | 0.246           |
| 15           | 0.0             | 0.0                | 0.0                    | N. A.           |
| 16           | 26.1            | 32.1               | 17.0                   | 0.243           |
| 17           | 4.3             | 3.6                | 6.0                    | 0.747           |
| 18           | 2.2             | 3.6                | 0.0                    | 0.418           |
| 19           | 17.8            | 25.0               | 6.0                    | 0.104           |
| 20           | 10.9            | 14.3               | 6.0                    | 0.353           |

Data are percentages.

N.A.: not available.

\* $P < 0.05$

Table S3. Correlation between diabetic retinopathy and PAID score

|                               | PAID (Baseline) | Spearman's rank correlation coefficient | <i>P</i> -value |
|-------------------------------|-----------------|-----------------------------------------|-----------------|
| Background retinopathy        | 35.0 (19.0)     | 0.003                                   | 0.986           |
| Pre-proliferative retinopathy | 36.0 (19.0)     |                                         |                 |
| Proliferative retinopathy     | 31.3 (N. A.)    |                                         |                 |
| Post-photocoagulation         | 32.9 (10.6)     |                                         |                 |

Data are presented as the mean (SD) or number.

N. A.: not available.

Table S4. Usage of various insulin pump functions

| Variables         | Total<br>n (%) | Adherent<br>n (%) | Non-adherent<br>n (%) | <i>P</i> -value |
|-------------------|----------------|-------------------|-----------------------|-----------------|
| Bolus calculator  |                |                   |                       |                 |
| Baseline          | 33 (76.7)      | 21 (77.8)         | 12 (75.0)             | >0.999          |
| 1-year            | 36 (83.7)      | 24 (88.9)         | 12 (75.0)             | 0.394           |
| <i>P</i> -value   | 0.508          | 0.453             | >0.999                |                 |
| Square-wave bolus |                |                   |                       |                 |
| Baseline          | 22 (52.4)      | 14 (53.8)         | 8 (50.0)              | >0.999          |
| 1-year            | 20 (47.6)      | 12 (46.2)         | 8 (50.0)              | >0.999          |
| <i>P</i> -value   | 0.688          | 0.625             | >0.999                |                 |
| Dual-wave bolus   |                |                   |                       |                 |
| Baseline          | 14 (34.1)      | 9 (34.6)          | 5 (33.3)              | >0.999          |
| 1-year            | 21 (51.2)      | 16 (61.5)         | 5 (33.3)              | 0.107           |
| <i>P</i> -value   | 0.016*         | 0.016*            | >0.999                |                 |
| Temporary basal   |                |                   |                       |                 |
| Baseline          | 31 (72.1)      | 18 (66.7)         | 13 (81.3)             | 0.315           |
| 1-year            | 32 (74.4)      | 19 (70.0)         | 13 (81.3)             | 0.494           |
| <i>P</i> -value   | >0.999         | >0.999            | >0.999                |                 |

Data are presented as the mean (SD) or number.

\**P* < 0.05
